# Supplementary material
Source: publisher site journal article supplement (https://www.e-cmh.org/upload/media/cmh-2023-0449-Supplementary-Table-8.pdf)
Supplement: Supplementary file 1 [file cmh-2023-0449-Supplementary-Table-8.pdf]

**Supplementary Table 8.** Primer sequences for qRT-PCR

| Name             | Sequence (5'-3')         |
|------------------|--------------------------|
| Capg Forward     | TGGCTGTGCATCTCAACACCCT   |
| Capg Reverse     | GTGAAATGCCGACTCTACACCAC  |
| Hyal3 Forward    | CTCCGTGTAGCCCTTTGGAG     |
| Hyal3 Reverse    | CTCCAATAGTCTGCATCAGGTCG  |
| Wipi1 Forward    | GAGTTCTGTGGAGCAGCTTGAC   |
| Wipi1 Reverse    | GACGTTTCATCTGCCGAGGTTTTG |
| Trem2 Forward    | CTACCAGTGTCAGAGTCTCCGA   |
| Trem2 Reverse    | CCTCGAAACTCGATGACTCCTC   |
| Spp1 Forward     | GCTTGGCTTATGGACTGAGGTC   |
| Spp1 Reverse     | CCTTAGACTCACCGCTCTTCATG  |
| Rnase6 Forward   | GTCGTCAACCATGCAACACAGC   |
| Rnase6 Reverse   | TCCGACCGTTCTTGCAGGTGA    |
| 18s rRNA Forward | GTAACCCGTTGAACCCATT      |
| 18s rRNA Reverse | CCATCCAATCGGTAGTAGCG     |
